# Supplementary material
Source: PubMed Central journal article supplement (PMC9387770)
Supplement: NIHMS1797295-supplement-SI.pdf [file NIHMS1797295-supplement-SI.pdf]

**Effects of the Nature of the Metal Ion, Protein and Substrate on the Catalytic  
Center in Matrix Metalloproteinase-1: Insights from Multilevel MD, QM/MM  
and QM Studies**

Ann Varghese,<sup>a</sup> Shobhit S. Chaturvedi,<sup>a</sup> Bella DiCatri,<sup>a</sup> Emerald Mehler,<sup>b</sup> Gregg B. Fields,<sup>c</sup> and

Tatyana G. Karabancheva-Christova<sup>a\*</sup>

<sup>a</sup>Department of Chemistry, Michigan Technological University, Houghton, Michigan 49931

<sup>b</sup>Department of Chemical Engineering, Michigan Technological University, Houghton,  
Michigan 33458

<sup>b</sup>Department of Chemistry and Biochemistry and I-HEALTH, Florida Atlantic University,  
Jupiter, Florida 33458

## Table of Contents

| <b>List of Figures</b> |                                                                                                                                                                                                                                         |            |
|------------------------|-----------------------------------------------------------------------------------------------------------------------------------------------------------------------------------------------------------------------------------------|------------|
| <b>Figure S1</b>       | Subsite locations in the CAT domain of MMP-1.                                                                                                                                                                                           | <b>S6</b>  |
| <b>Figure S2</b>       | Multiple trajectories of a) MMP-1•no THP b) MMP-1•Co <sub>1</sub> •THP.                                                                                                                                                                 | <b>S6</b>  |
| <b>Figure S3</b>       | Superimposed catalytic Zn(II)/Co(II) site of a) MMP-1•no THP with Wat <sub>3</sub> in the QM site (khaki) and MM region (orange) b) MMP-1 Co <sub>1</sub> •no THP with Wat <sub>3</sub> in the QM site (coral) and MM region (magneta). | <b>S7</b>  |
| <b>Figure S4.</b>      | Superimposed catalytic Zn(II) site of MMP-1•THP in the QM/MM optimized structure (green) and the a) QM-only (yellow) and b) QM-continuum model (ocean blue).                                                                            | <b>S9</b>  |
| <b>Figure S5</b>       | Superimposed catalytic Zn(II) site of MMP-1•THP in the QM/MM optimized geometry (green) with the QM-only (yellow) and QM-continuum model (ocean blue).                                                                                  | <b>S9</b>  |
| <b>Figure S6</b>       | The catalytic site of MMP-1•THP. a) Catalytic site in the QM/MM optimized structure and X-ray crystallographic structure. b) Catalytic site in the QM/MM optimized structure and MD snapshot.                                           | <b>S10</b> |
| <b>Figure S7</b>       | RMSD profile of MMP-1•THP and MMP-1•no THP.                                                                                                                                                                                             | <b>S12</b> |
| <b>Figure S8</b>       | Principal component analysis of MMP-1•no THP.                                                                                                                                                                                           | <b>S12</b> |

|                       |                                                                                                                                                                                                                                                                                                                                         |            |
|-----------------------|-----------------------------------------------------------------------------------------------------------------------------------------------------------------------------------------------------------------------------------------------------------------------------------------------------------------------------------------|------------|
| <b>Figure S9</b>      | Dynamic cross-correlation analysis of a) MMP-1•THP, and b) MMP-1•no THP.                                                                                                                                                                                                                                                                | <b>S13</b> |
| <b>Figure S10</b>     | Comparison of a) RMSD, b) distance between the center of mass of catalytic Zn(II)/Co(II) and structural Zn(II) bonded residues, c) distance between the center of mass of the CAT and HPX domains, and d) distance between the center of mass of catalytic site and the scissile bond between MMP-1•THP and MMP-1 Co <sub>1</sub> •THP. | <b>S15</b> |
| <b>Figure S11</b>     | Superimposed RMSDs of MMP-1•THP and MMP-1 Co <sub>1</sub> •THP. RMSDs of a) CAT domain, b) HPX domain, c) S-loop, d) V-B loop, e) linker, and f) THP.                                                                                                                                                                                   | <b>S16</b> |
| <b>Figure S12</b>     | Superimposed RMSFs of MMP-1•THP and MMP-1 Co <sub>1</sub> •THP. RMSF of the a) CAT domain b) HPX domain c) S-loop d) V-B loop e) linker and f) THP.                                                                                                                                                                                     | <b>S17</b> |
| <b>Figure S13</b>     | Dynamic Cross-Correlation Analysis of MMP-1 Co <sub>1</sub> •THP.                                                                                                                                                                                                                                                                       | <b>S18</b> |
| <b>Figure S14</b>     | Principal Component Analysis of MMP-1 Co <sub>1</sub> •THP.                                                                                                                                                                                                                                                                             | <b>S20</b> |
| <b>Figure S15</b>     | SASA of the a) V-B loop and the b) S <sub>1</sub> ' Specificity loop in the MD of MMP-1 Co <sub>1</sub> •no THP (magenta) and MMP-1 Co <sub>1</sub> •no Zn <sub>2</sub> no THP (yellow).                                                                                                                                                | <b>S22</b> |
| <b>List of Tables</b> |                                                                                                                                                                                                                                                                                                                                         |            |
| <b>Table S1</b>       | Cosine content of the first three PC's of the trajectories of MMP-1•no THP and MMP-1 Co <sub>1</sub> •THP.                                                                                                                                                                                                                              | <b>S7</b>  |

|                 |                                                                                                                                                                                                                                                                                   |            |
|-----------------|-----------------------------------------------------------------------------------------------------------------------------------------------------------------------------------------------------------------------------------------------------------------------------------|------------|
| <b>Table S2</b> | Distances between the center of mass of catalytic site and scissile bond, the center of mass of catalytic and structural site, and center of mass of the CAT and HPX domains compared among the X-ray crystallographic structure, MD trajectory, and QM/MM approach of MMP-1•THP. | <b>S8</b>  |
| <b>Table S3</b> | Mulliken charges of catalytic Zn(II) coordinated residues in the QM/MM and QM/continuum model for MMP-1•THP.                                                                                                                                                                      | <b>S11</b> |
| <b>Table S4</b> | Distances between catalytic Zn(II) and the coordinated histidine residues in multiple snapshots of the QM/MM optimized geometry of MMP-1•THP.                                                                                                                                     | <b>S11</b> |
| <b>Table S5</b> | Angles between the catalytic Zn(II) ion and the coordinated histidine residues in multiple snapshots of the QM/MM optimized geometry of MMP-1•THP.                                                                                                                                | <b>S11</b> |
| <b>Table S6</b> | Distances between Zn(II) and coordinating residues in the catalytic site in the QM/MM analysis of MMP-1•THP and MMP-1•no THP.                                                                                                                                                     | <b>S13</b> |
| <b>Table S7</b> | Angles between the catalytic Zn(II) ion and the coordinated histidines in the QM/MM approach for MMP-1•THP and MMP-1•no THP.                                                                                                                                                      | <b>S14</b> |
| <b>Table S8</b> | Hydrogen bonding interaction in the QM/MM optimized geometry of the catalytic and structural site of MMP-1•THP and MMP-1•no THP.                                                                                                                                                  | <b>S14</b> |

|                  |                                                                                                                                                                                                       |            |
|------------------|-------------------------------------------------------------------------------------------------------------------------------------------------------------------------------------------------------|------------|
| <b>Table S9</b>  | Spin densities of the ligands in the catalytic site of MMP-1<br>Co <sub>1</sub> •THP.                                                                                                                 | <b>S20</b> |
| <b>Table S10</b> | Distances between Co(II) and the coordinating residues in MMP-1<br>1 Co <sub>1</sub> •THP and MMP-1 Co <sub>1</sub> •no THP in the QM/MM optimized<br>structure.                                      | <b>S21</b> |
| <b>Table S11</b> | Angles between Co(II) and the coordinating residues in MMP-1<br>Co <sub>1</sub> •THP and MMP-1 Co <sub>1</sub> •no THP in the QM/MM optimized<br>structure.                                           | <b>S21</b> |
| <b>Table S12</b> | Hydrogen bonding interactions observed in the catalytic and<br>structural site of QM/MM optimized structure in MMP-1 Co <sub>1</sub> •no<br>THP and MMP-1 Co <sub>1</sub> •no Zn <sub>2</sub> no THP. | <b>S22</b> |

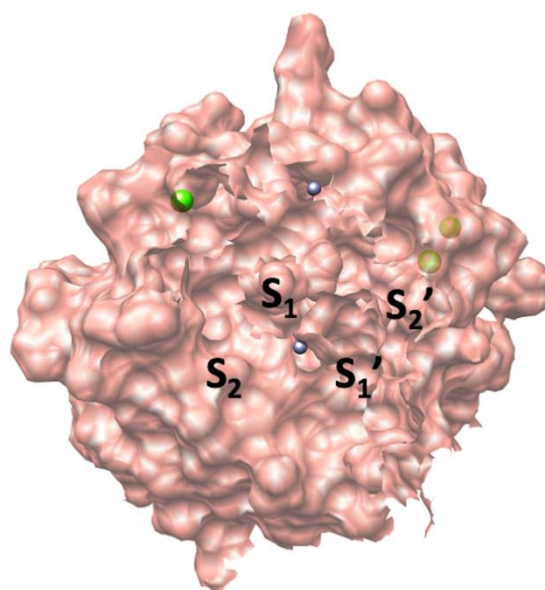

Figure S1. Subsite locations in the CAT domain of MMP-1.

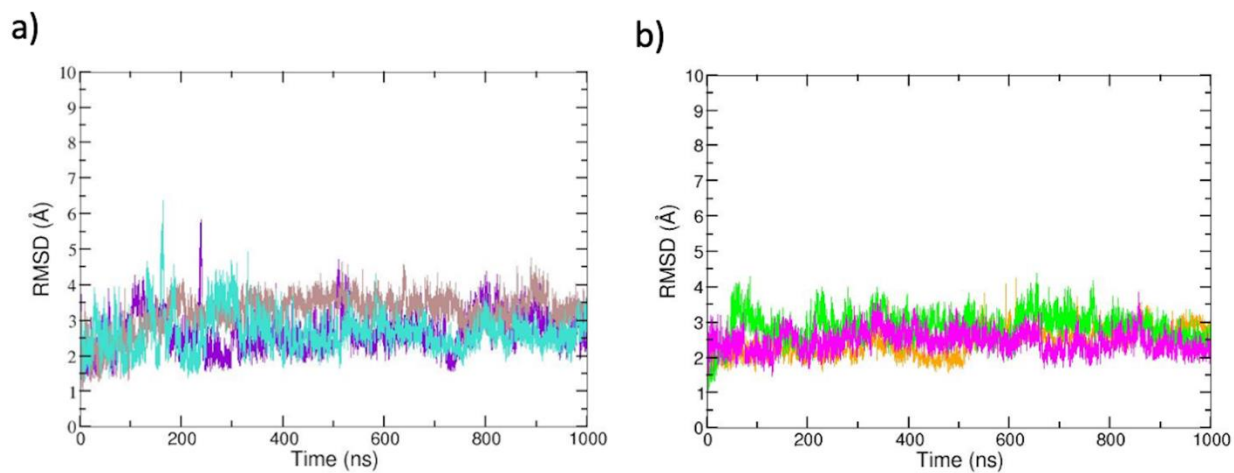

Figure S2. Multiple trajectories of a) MMP-1•no THP and b) MMP-1•Co<sub>1</sub>•THP. The single trajectory used for further calculations is depicted in violet for MMP-1•no THP and yellow for MMP-1•Co<sub>1</sub>•THP.

Table S1: Cosine content of the first three PC's of the trajectories of MMP-1•no THP and MMP-1 Co<sub>1</sub>•THP. Cosine content value less than 0.5 is indicative of good sampling.

| PC's | MMP-1•no THP | MMP-1 Co <sub>1</sub> •THP |
|------|--------------|----------------------------|
| PC1  | 0.08         | 0.57                       |
| PC2  | 0.00         | 0.03                       |
| PC3  | 0.03         | 0.13                       |

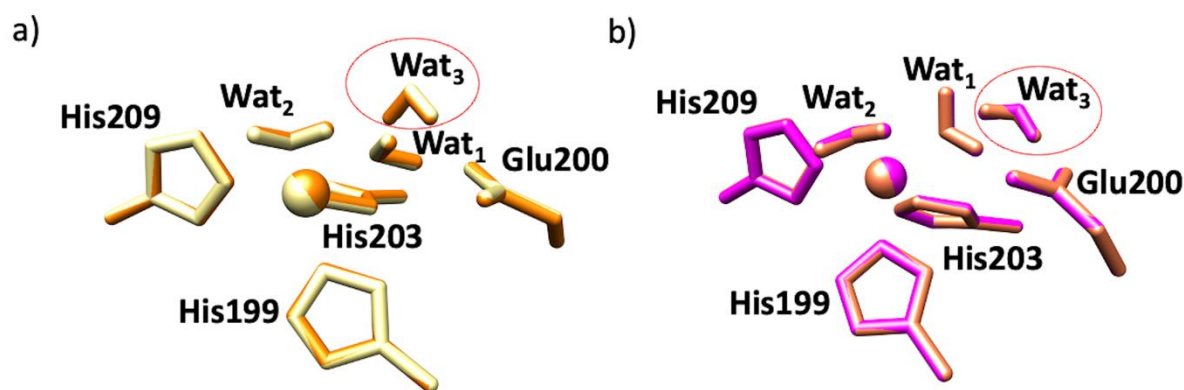

Figure S3: Superimposed catalytic Zn(II)/Co(II) site of a) MMP-1•no THP with Wat<sub>3</sub> in the QM site (khaki) and MM region (orange) b) MMP-1 Co<sub>1</sub>•no THP with Wat<sub>3</sub> in the QM site (coral) and MM region (magenta).

### Conformational Analysis of MMP-1•THP

We calculated the distances between various important sites in the domains of MMP-1. Comparing the distances as in Table S2, it was identified that the distances between the center of mass of the catalytic site and the scissile bond in the MD trajectory and the QM/MM optimized structure are in good accord with the X-ray crystallographic structure of the enzyme. However, a more

significant deviation in the distance between the catalytic and the structural site ranging from 13.93 – 14.39 Å was noticed. In addition, we calculated the distance between the center of mass of CAT and HPX domains. The crystallographic structure of the enzyme provided a distance of 38.71 Å between the domains, which showed a minor increase to 38.94 Å during the MD simulation. QM/MM calculations provided the distance between the domains in good agreement with the crystallographic structure.

Table S2. Distances between the center of mass of catalytic site and scissile bond, the center of mass of catalytic and structural site, and the center of mass of the CAT and HPX domains compared among the X-ray crystallographic structure, MD trajectory, and QM/MM model of MMP-1•THP.

|                                                    | Distance (Å)      |       |       |
|----------------------------------------------------|-------------------|-------|-------|
|                                                    | Crystal structure | MD    | QM/MM |
| Center of mass of catalytic site and scissile bond | 8.44              | 8.52  | 8.50  |
| Center of mass of catalytic and structural site    | 13.93             | 14.39 | 14.06 |
| Center of mass of CAT and HPX domains              | 38.71             | 38.94 | 38.78 |



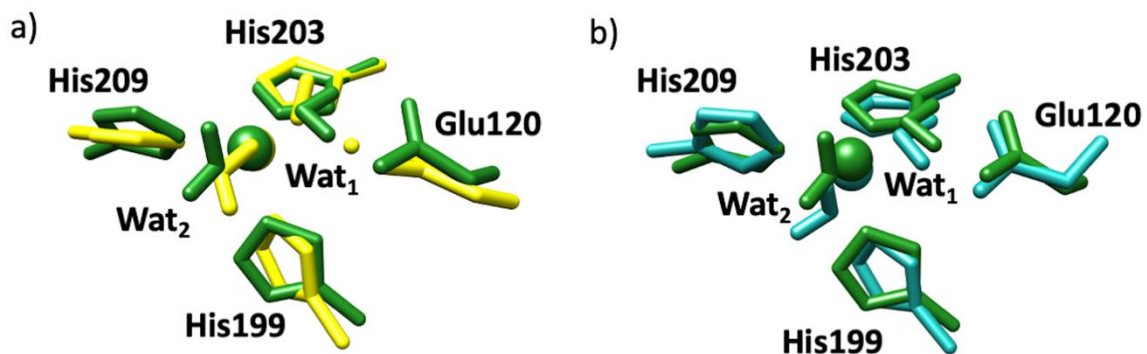

Figure S4. Superimposed catalytic Zn(II) site of MMP-1•THP in the QM/MM optimized structure (green) and the a) QM-only (yellow) and b) QM-continuum model (ocean blue).

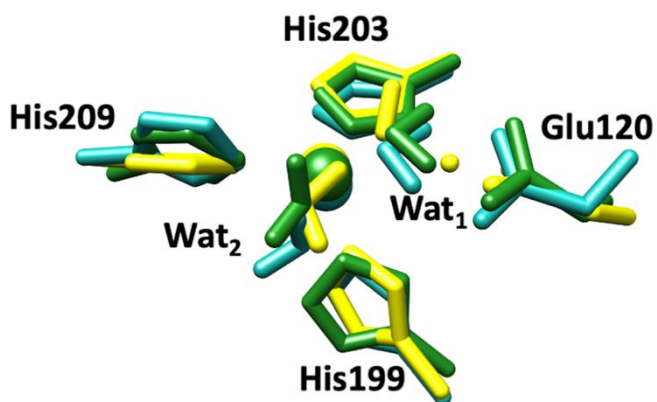

Figure S5. Superimposed catalytic Zn(II) site of MMP-1•THP in the QM/MM optimized geometry (green) with the QM-only (yellow) and QM-continuum model (ocean blue).

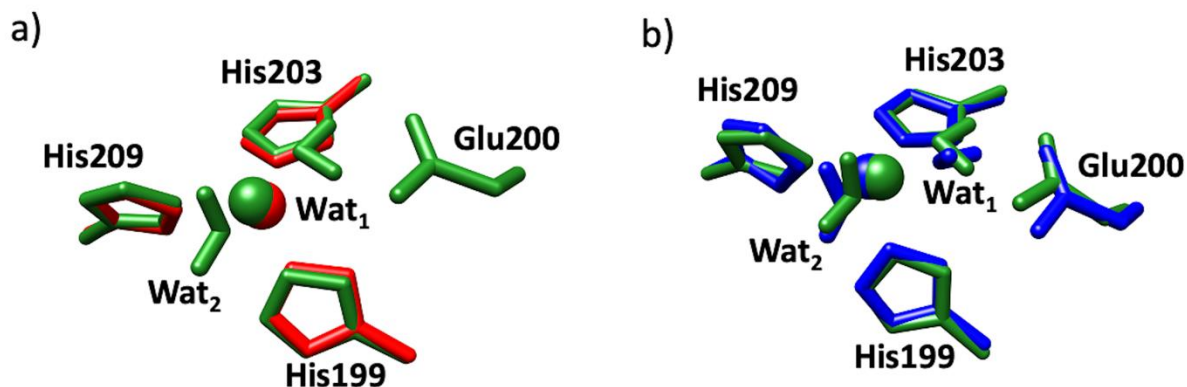

Figure S6. Catalytic site of MMP-1•THP. a) Superimposed catalytic site in the QM/MM optimized structure (green) and X-ray crystallographic structure (red). b) Superimposed catalytic site in the QM/MM optimized structure (green) and MD snapshot (blue).

### Mulliken Charge Distribution in MMP-1•THP

The Mulliken charge distribution in the catalytic site of MMP-1 was analyzed to learn more about the nature of Zn(II) coordination. Table S3 represents the Mulliken charges for the Zn(II) and the coordinated histidines in the catalytic site. Both QM/MM and QM-continuum models display Zn(II) as a center of positive charge. The electrostatic embedding scheme for QM/MM shows a slightly higher electropositivity of 0.84. The electronegativity of nitrogen atoms of histidine residues coordinated to the catalytic Zn(II) calculated by the population analysis is almost identical for both models.

Table S3. Mulliken charges of catalytic Zn(II) coordinated residues in the QM/MM and QM-continuum approach for MMP-1•THP.

| Atoms        | Charge |              |
|--------------|--------|--------------|
|              | QM/MM  | QM/continuum |
| Zn(II)       | 0.84   | 0.81         |
| His199-NE2   | -0.29  | -0.27        |
| His203 - NE2 | -0.28  | -0.27        |
| His209-NE2   | -0.29  | -0.28        |

Table S4. Distances between catalytic Zn(II) and the coordinated histidine residues in multiple snapshots (snapshot 1 chosen for further calculations) of the QM/MM optimized geometry of MMP-1•THP.

| Atoms  |            | Bond length (Å) |            |            |            |            |
|--------|------------|-----------------|------------|------------|------------|------------|
|        |            | Snapshot 1      | Snapshot 2 | Snapshot 3 | Snapshot 4 | Snapshot 5 |
| Zn(II) | His199-NE2 | 2.06            | 2.06       | 2.08       | 2.05       | 2.07       |
| Zn(II) | His203-NE2 | 2.19            | 2.18       | 2.14       | 2.14       | 2.18       |
| Zn(II) | His209-NE2 | 2.05            | 2.04       | 2.07       | 2.03       | 2.08       |

Table S5. Angles between the catalytic Zn(II) ion and the coordinated histidine residues in multiple snapshots (snapshot 1 chosen for further calculations) of the QM/MM optimized geometry of MMP-1•THP.

| Atoms      |        |            | Angle (°)  |            |            |            |            |
|------------|--------|------------|------------|------------|------------|------------|------------|
|            |        |            | Snapshot 1 | Snapshot 2 | Snapshot 3 | Snapshot 4 | Snapshot 5 |
| His199-NE2 | Zn(II) | His203-NE2 | 103.33     | 98.46      | 102.97     | 101.29     | 98.85      |
| His203-NE2 | Zn(II) | His209-NE2 | 93.73      | 94.86      | 95.53      | 95.47      | 94.10      |
| His199-NE2 | Zn(II) | His209-NE2 | 108.67     | 111.08     | 106.08     | 111.52     | 107.10     |

## Investigating the effects of the substrate in MMP-1

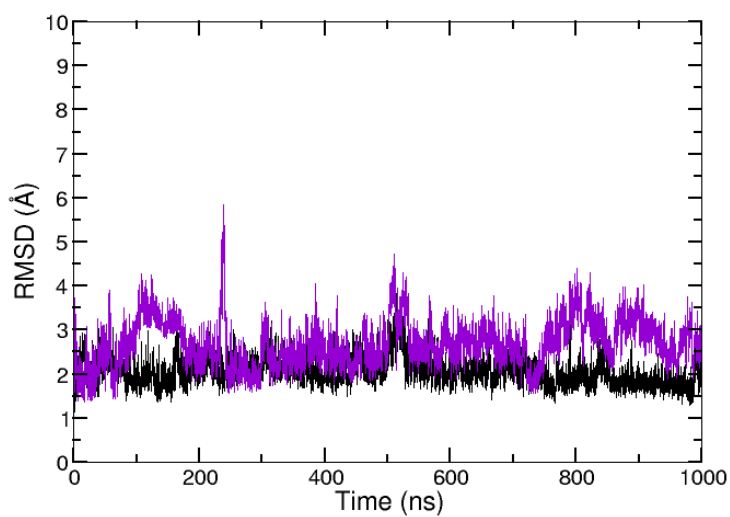

Figure S7. RMSD of MMP-1•THP (black) and MMP-1•no THP (violet).

## Principal Component Analysis and Dynamic Cross-Correlation Analysis of MMP-1•no THP

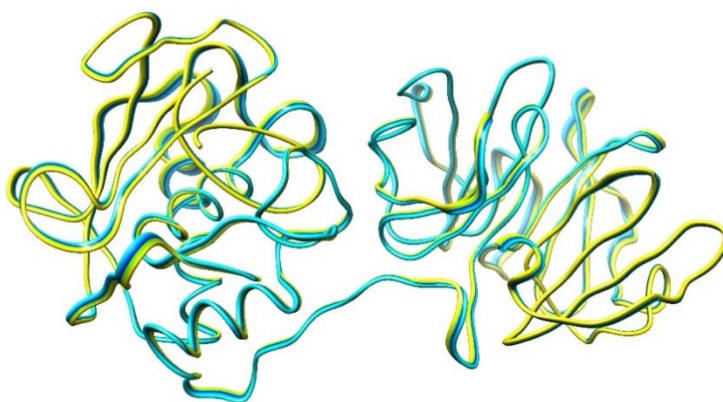

Figure S8. Principal component analysis of MMP-1•no THP. Yellow to blue represents the direction of motion.

Table S6. Distances between Zn(II) and coordinating residues in the catalytic site in the QM/MM analysis of MMP-1•THP and MMP-1•no THP.

| Atoms  |            | Bond length (Å) |              |
|--------|------------|-----------------|--------------|
|        |            | MMP-1•THP       | MMP-1•no THP |
| Zn(II) | His199-NE2 | 2.06            | 2.07         |
| Zn(II) | His203-NE2 | 2.19            | 2.18         |
| Zn(II) | His209-NE2 | 2.05            | 2.08         |

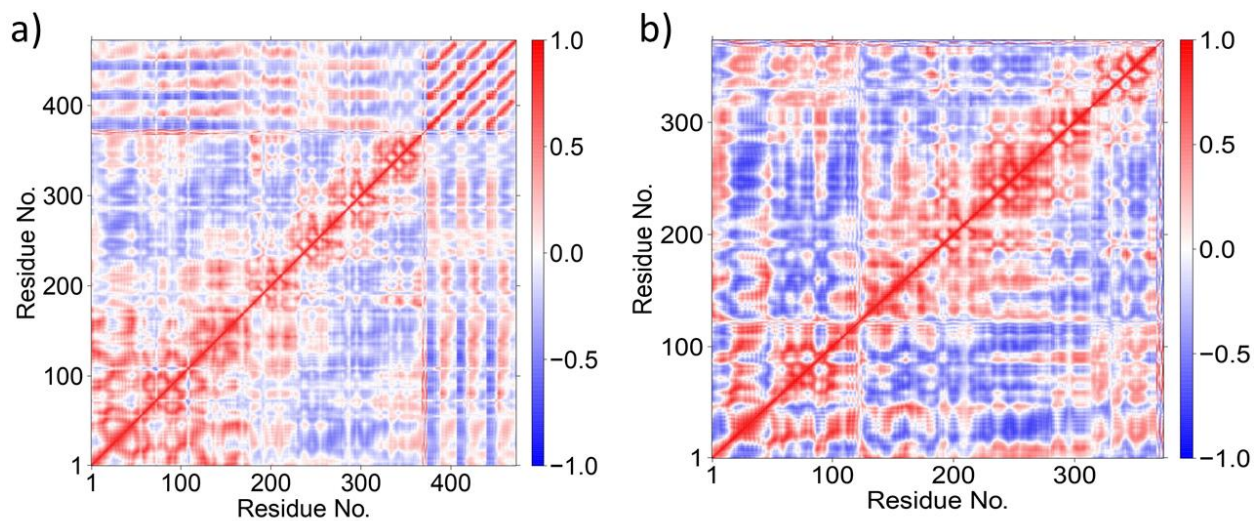

Figure S9. Dynamic cross-correlation analysis of a) MMP-1•THP, and b) MMP-1•no THP. Red color represents positive correlation and blue represents anti-correlation.

Table S7. Angles between the catalytic Zn(II) ion and the coordinated histidines in the QM/MM approach for MMP-1•THP and MMP-1•no THP.

| Atoms      |        |            | Angle (degrees) (QM/MM) |              |
|------------|--------|------------|-------------------------|--------------|
|            |        |            | MMP-1•THP               | MMP-1•no THP |
| His199-NE2 | Zn(II) | His203-NE2 | 103.33                  | 101.93       |
| His203-NE2 | Zn(II) | His209-NE2 | 93.73                   | 92.32        |
| His199-NE2 | Zn(II) | His209-NE2 | 108.67                  | 113.70       |

Table S8. Hydrogen bonding interaction in the QM/MM optimized geometry of the catalytic and structural site of MMP-1•THP and MMP-1•no THP.

| Atoms                  |            |            | Bond length (Å) |              |
|------------------------|------------|------------|-----------------|--------------|
|                        |            |            | MMP-1•THP       | MMP-1•no THP |
| Donor                  | Donor H    | Acceptor   |                 |              |
| <b>CATALYTIC SITE</b>  |            |            |                 |              |
| His199-ND1             | His199-HD1 | Leu216-O   | 2.82            | 2.75         |
| His199-ND1             | His199-H   | Arg195-O   | Not present     | 2.91         |
| His203-N               | His203-H   | Glu200-O   | 2.74            | 2.75         |
| His209-N               | His209-H   | Ser208-OG  | 2.85            | Not present  |
| <b>STRUCTURAL SITE</b> |            |            |                 |              |
| His177-N               | His177-H   | His164-O   | 2.81            | 2.82         |
| His164-N               | His164-H   | His177-O   | 2.92            | 3.05         |
| Ser153-N               | Ser153-H   | Asp151-O   | 2.78            | Not present  |
| Ser153-N               | Ser153-H   | Asp151-OD1 | Not present     | 2.88         |

## Conformational Analysis of MMP-1 Co<sub>1</sub>•THP

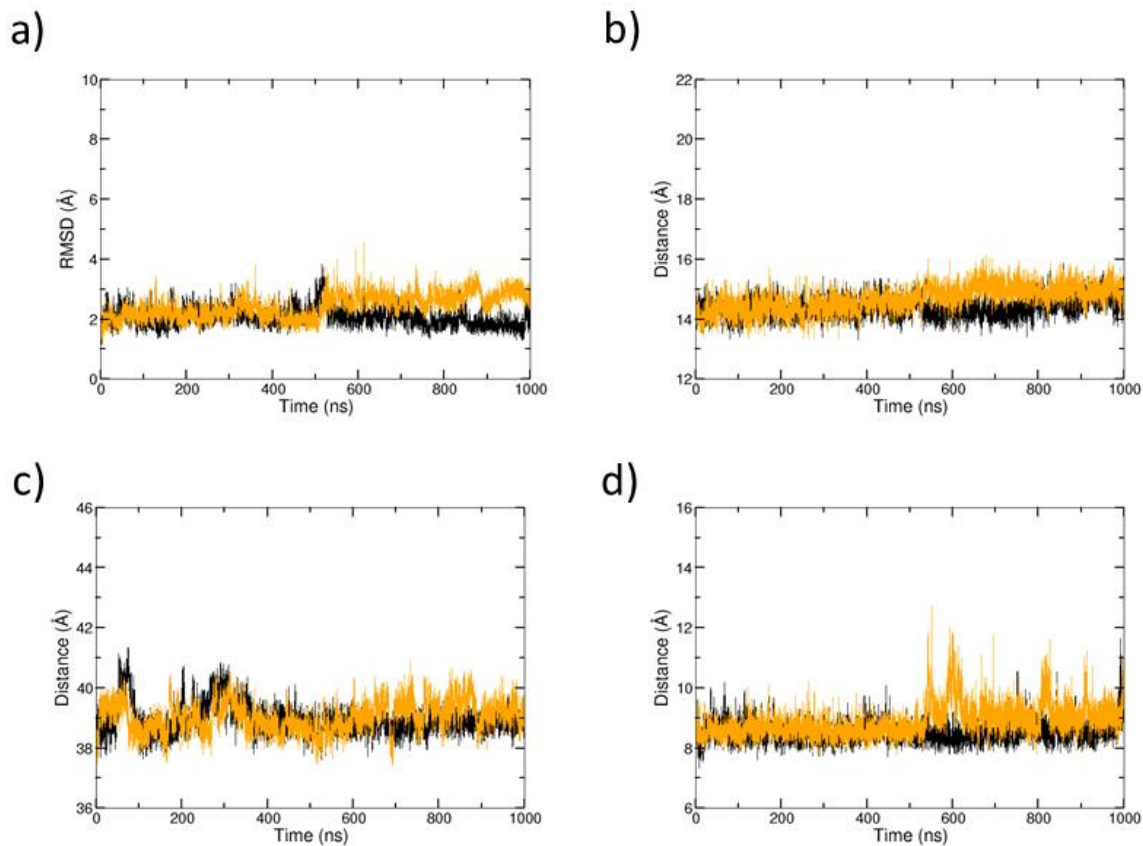

Figure S10. Comparison of a) RMSD, b) distance between the center of mass of catalytic Zn(II)/Co(II) and structural Zn(II) bonded residues, c) distance between the center of mass of the CAT and HPX domains, and d) distance between the center of mass of catalytic site and the scissile bond between MMP-1•THP (black) and MMP-1 Co<sub>1</sub>•THP (orange).



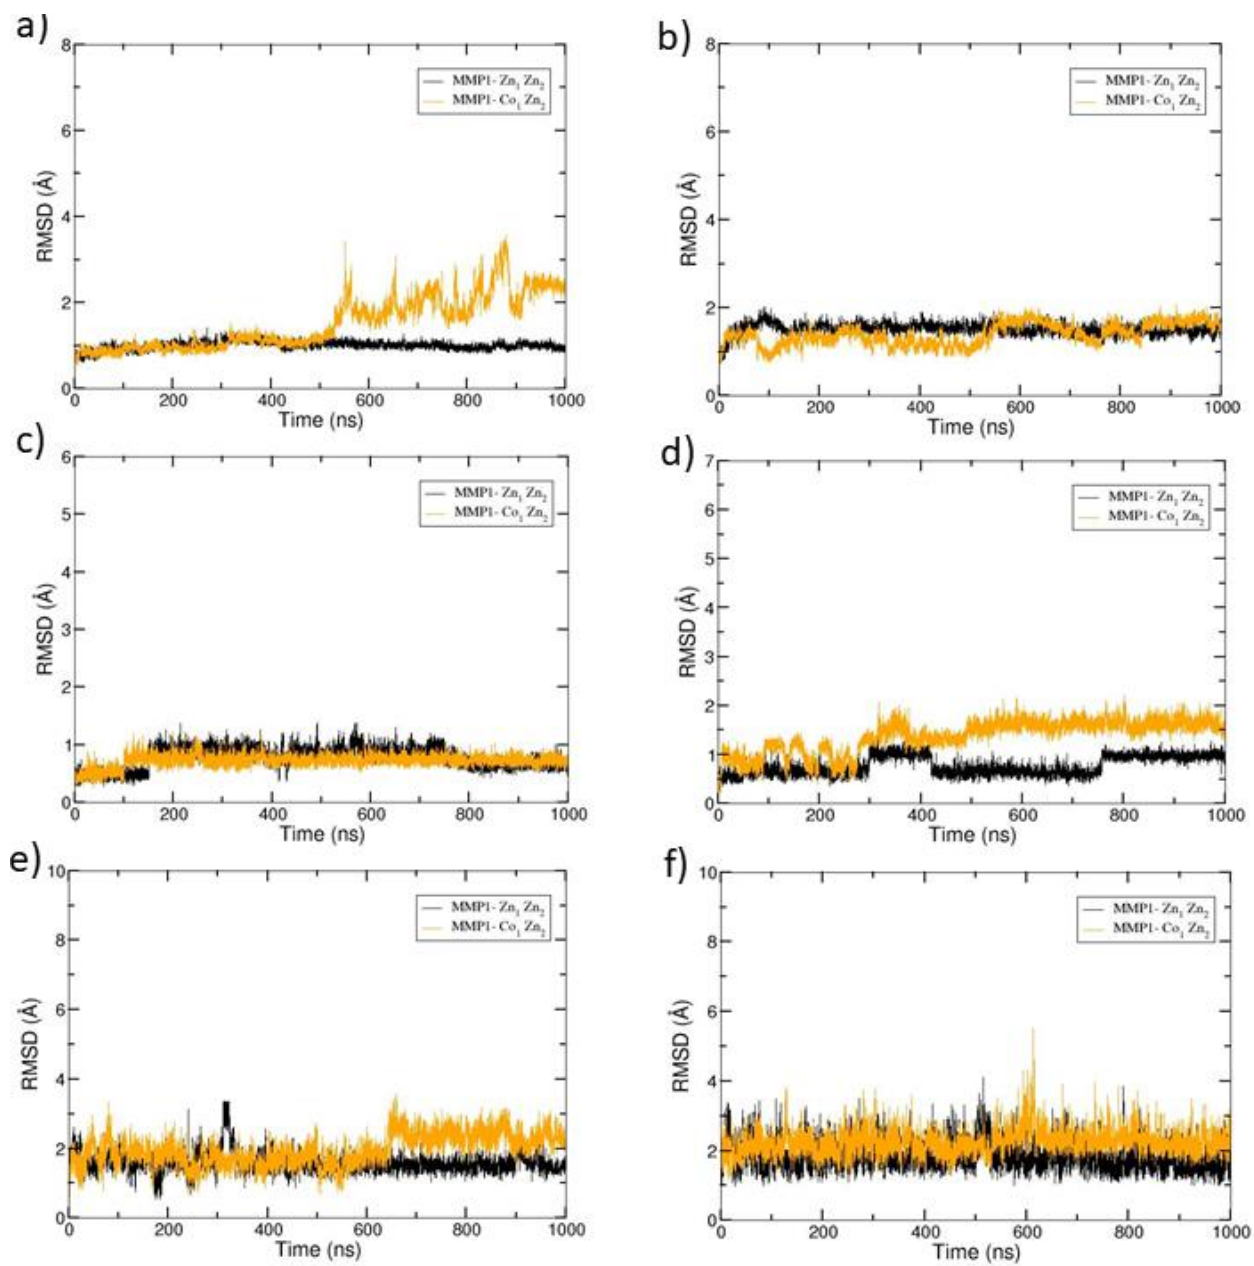

Figure S11. Superimposed RMSDs of MMP-1•THP (black) and MMP-1 Co<sub>1</sub>•THP (orange). RMSD of a) CAT domain, b) HPX domain, c) S-loop, d) V-B loop, e) linker, and f) THP.



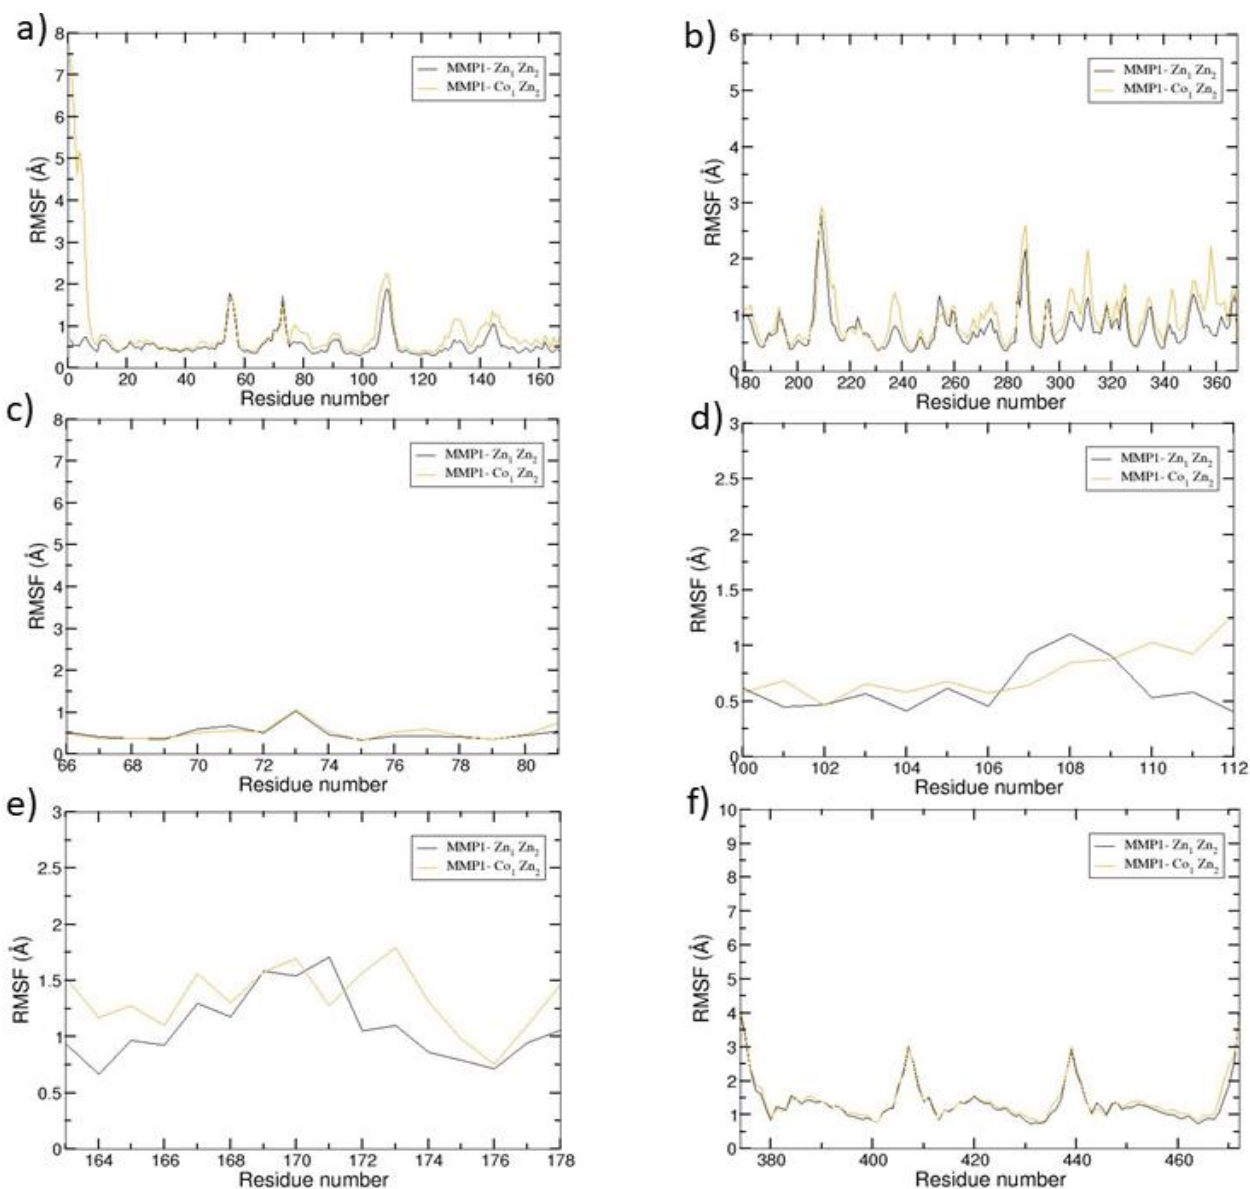

Figure S12. Superimposed RMSFs of MMP-1•THP (black) and MMP-1 Co<sub>1</sub>•THP (orange). RMSF of the a) CAT domain [residue numbering corresponds to the X-ray crystallographic structure (PDB ID: 4AUO) numbering 81-242 and incorporating the Zn(II), Co(II), and Ca(II) ions], b) HPX domain [residue numbering corresponds to the X-ray crystallographic structure numbering 259-447 and incorporating the Ca(II) ion], c) S-loop [residue numbering corresponds to 146-161], d) V-B loop [residue numbering corresponds to the X-ray crystallographic structure numbering 180-192], e) linker [residue numbering corresponds to crystal structure numbering 243-258], and f) THP [residue numbering corresponds to X-ray crystallographic structure numbering 963-995].

## Dynamic Cross-correlation Analysis and Principal Component Analysis of MMP-1 Co<sub>1</sub>•THP

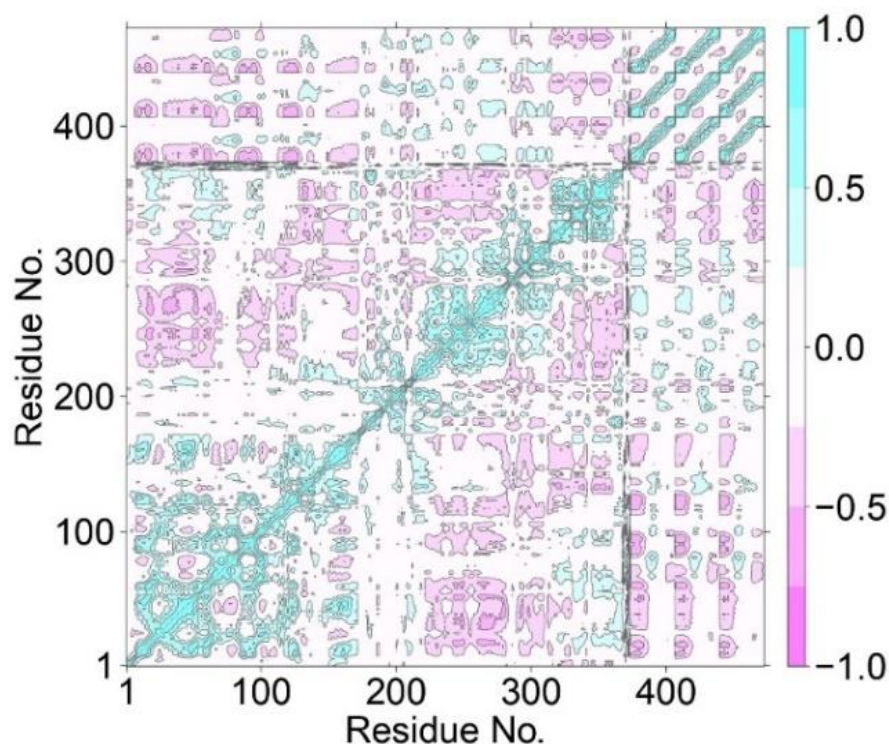

Figure S13. Dynamic Cross-Correlation Analysis of MMP-1 Co<sub>1</sub>•THP.

The DCCA of MMP-1 Co<sub>1</sub>•THP showed a positive correlation between the S<sub>10</sub>' exosite and the S<sub>1</sub>' specificity loop. However, the correlations were exhibited by a lesser span of exosite residues (282-283 and 292-300) compared to MMP-1•THP.<sup>[1]</sup> The Zn(II) ion in the catalytic site might have the specific role of maintaining these positive correlations. HPX blade 2 residues (except 302 and 304) showed no correlation to the S<sub>1</sub>' specificity loop. The blade residues retained their anti-correlating property with the V-B loop. However, only a minor segment of the S-loop was involved in anti-correlation with the blade residues (331-333 and 338-341). The positive correlation of the structural Zn(II) and catalytic site metal ion with the S loop residues were not affected by Co(II) substitution. The structural Zn(II) had positive correlations with a lower fraction of V-B loop

residues upon Co(II) substitution (179-184 and 193). The same trends were seen with catalytic site metal ion and the V-B loop residues for Zn(II) and Co(II) (179 and 191-193). In contrast, the anti-correlation of Arg189 with the structural Zn(II) was lost upon Co(II) substitution. While some correlations in MMP-1•THP disappeared in the Co(II) engineered enzyme, correlated motions involving a larger number of residues were observed in some parts.<sup>[1]</sup> For example, most of the V-B loop residues were involved in a positive correlation with the S-loop. The conserved Gly252 of the linker lost the positive correlation with the catalytic Co(II) bound residues and the S<sub>1</sub>' specificity loop. A loss of anti-correlation was observed between the scissile peptide bond residues Gly775 and Leu776 and the structural Zn(II). The loss of correlated motions on the replacement of Zn(II) by Co(II) may affect the structural characteristics of the enzyme but not the catalytic efficiency, as Co(II)-substituted metalloproteinases are capable of catalytic activity. A new correlation seen in the Co(II) system in contrast to MMP-1•THP was the anti-correlation between the V-B loop (residues 181-188) and N-terminal loop residues (88-91).<sup>[1]</sup> The THP leading (L) strand residues (767-774) developed a positive correlation with residues 324-330 of blade 2 upon substitution with Co(II). These results point towards the allosteric control of the catalytic Zn(II). THP-THP interactions observed were similar to MMP-1•THP.

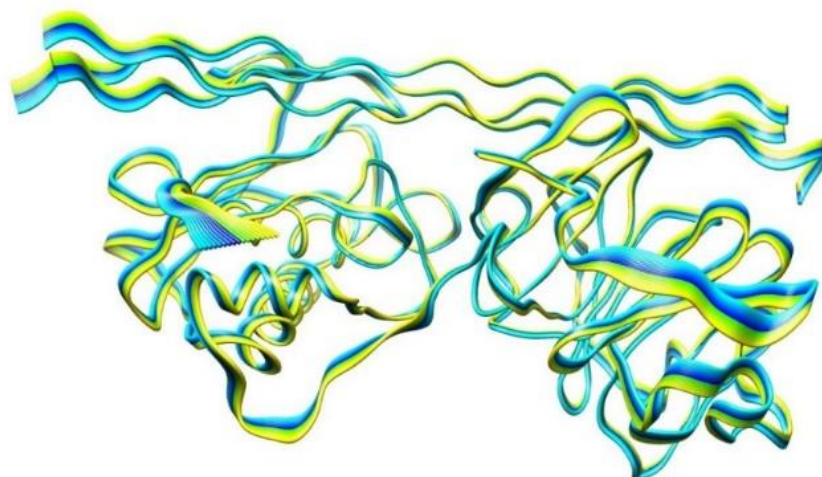

Figure S14. Principal Component Analysis of MMP-1 Co<sub>1</sub>•THP. PCA of the Co(II)-substituted MMP-1•THP complex indicated that the HPX domain exhibited more flexible movements compared to CAT domain. The N-terminal loop showed vigorous movements. The linker region near CAT domain moved in the same direction as CAT domain while the linker region near the HPX domain moved similar to the domain. Flexible movements were observed in the linker.

### Investigating the effects of the substrate in cobalt substituted MMP-1

Table S9. Spin densities of the ligands in the QM/MM catalytic site of MMP-1 Co<sub>1</sub>•THP

| Ligands | Spin Density |
|---------|--------------|
| Co(II)  | 2.82         |
| His191  | 0.03         |
| Glu200  | 0.00         |
| His203  | 0.03         |
| His209  | 0.03         |

Table S10. Distances between Co(II) and the coordinating residues in MMP-1 Co<sub>1</sub>•THP and MMP-1 Co<sub>1</sub>•no THP in the QM/MM optimized structure.

| Atoms  |            | Distance (Å)               |                               |
|--------|------------|----------------------------|-------------------------------|
|        |            | MMP-1 Co <sub>1</sub> •THP | MMP-1 Co <sub>1</sub> •no THP |
| Co(II) | His199-NE2 | 2.07                       | 2.09                          |
| Co(II) | His203-NE2 | 2.11                       | 2.11                          |
| Co(II) | His209-NE2 | 2.09                       | 2.04                          |

Table S11. Angles between Co(II) and the coordinating residues in MMP-1 Co<sub>1</sub>•THP and MMP-1 Co<sub>1</sub>•no THP in the QM/MM optimized structure.

| Atoms      |        |            | Angle (degrees)            |                               |
|------------|--------|------------|----------------------------|-------------------------------|
|            |        |            | MMP-1 Co <sub>1</sub> •THP | MMP-1 Co <sub>1</sub> •no THP |
| His199-NE2 | Co(II) | His203-NE2 | 105.39                     | 100.24                        |
| His203-NE2 | Co(II) | His209-NE2 | 96.70                      | 101.57                        |
| His199-NE2 | Co(II) | His209-NE2 | 107.71                     | 105.07                        |

Bond lengths and bond angles of the catalytic Co(II) and the coordinated histidines of the MMP-1 Co<sub>1</sub>•THP and MMP-1 Co<sub>1</sub>•no THP in the QM/MM approach were calculated (Tables S10 and S11). The THP did not likely influence the active site bonds. The MD and QM/MM optimized structure bond lengths remained approximately constant. The angles involved with the catalytic site showed a different trend. The binding of the THP resulted in larger angles between His199 – Co(II) – His203 (105.39°) and His199 – Co(II) – His209 (107.71°). In contrast, the angle between His203 – Co(II) – His209 decreased from 101.57° in MMP-1 Co<sub>1</sub>•no THP to 96.70° in MMP-1 Co<sub>1</sub>•THP.

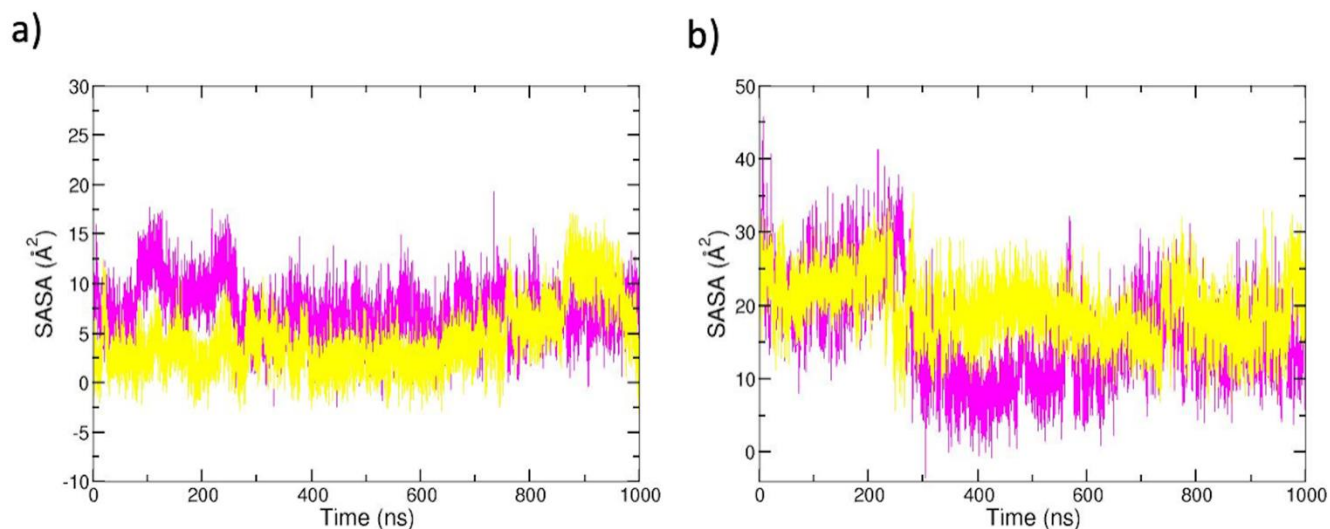

Figure S15: SASA of the a) V-B loop and the b) S<sub>1</sub>' Specificity loop in the MD of MMP-1

Co<sub>1</sub>•no THP (magenta) and MMP-1 Co<sub>1</sub>•no Zn<sub>2</sub> no THP (yellow).

Table S12. Hydrogen bonding interactions observed in the catalytic and structural site of QM/MM optimized structure in MMP-1 Co<sub>1</sub>•no THP and MMP-1 Co<sub>1</sub>•no Zn<sub>2</sub> no THP.

| Atoms                  |            |            | Bond length (Å)              |                                                 |
|------------------------|------------|------------|------------------------------|-------------------------------------------------|
| Donor                  | DonorH     | Acceptor   | MMP1-Co <sub>1</sub> •no THP | MMP1-Co <sub>1</sub> •no Zn <sub>2</sub> no THP |
| <b>CATALYTIC SITE</b>  |            |            |                              |                                                 |
| His199-ND1             | His199-HD1 | Leu216-O   | 2.78                         | 2.88                                            |
| His203-N               | His203-H   | Glu200-O   | 2.73                         | 2.78                                            |
| <b>STRUCTURAL SITE</b> |            |            |                              |                                                 |
| His177-N               | His177-H   | His164-O   | 2.84                         | 2.81                                            |
| His164-N               | His164-H   | His177-O   | 3.00                         | 2.93                                            |
| His149-ND1             | His149-HD1 | Asp151-O   | Not Present                  | 2.85                                            |
| Ser153-N               | Ser153-H   | Asp151-OD1 | 2.97                         | 3.13                                            |

## REFERENCES

- [1] A. Varghese, S. S. Chaturvedi, G. B. Fields, T. G. Karabancheva-Christova, *J. Biol. Inorg Chem.* **2021**, *26*, 583–597.
